# Supplementary material for: Ubiquitination of Major Histocompatibility Complex II Changes Its Immunological Recognition Structure
Source: MDPI journal article supplement (doi:10.3390/ijms242317083), 2023-12-03
Supplement: s1 [file s1]

## Supplementary Figures

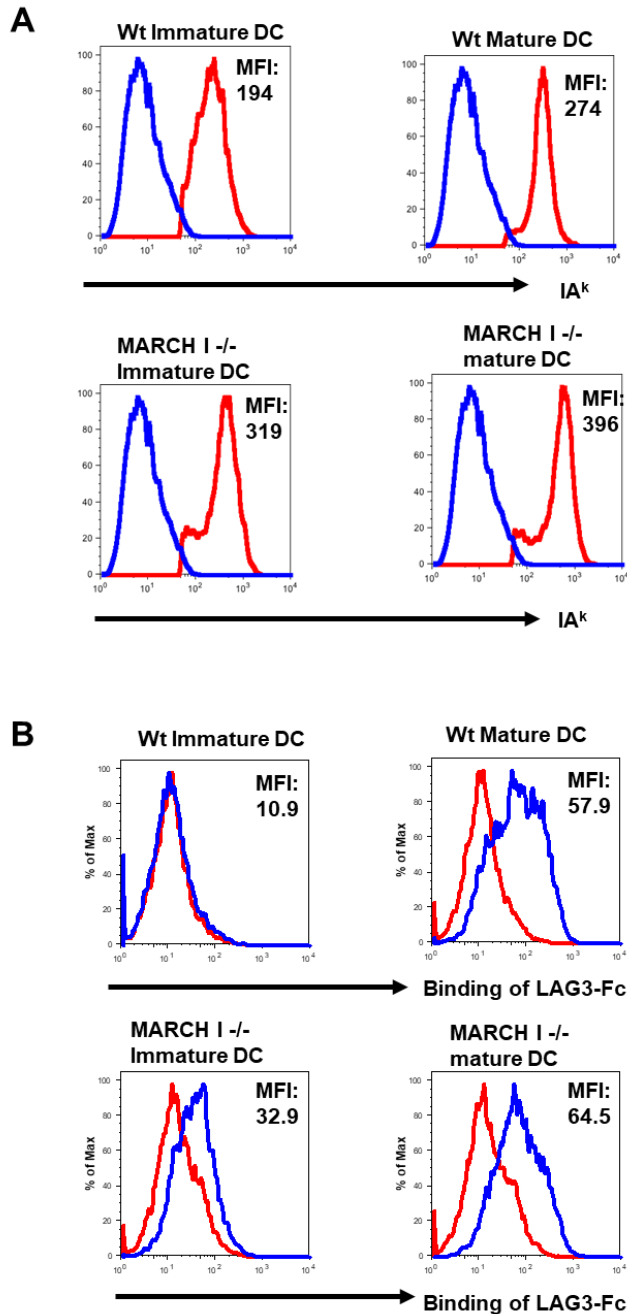

**Supplementary Figure S1.** LAG-3 bound non-ubiquitinated MHC II. Immature DCs were differentiated from either wt bone marrow cells or MARCH I <sup>-/-</sup> bone marrow cells in the presence of GM-CF for 10 days. Mature DCs were stimulated by LPS for last 24 h. (A) Flow cytometric analysis for expression of MHC II on CD11c positive immature DCs or Mature DC. (B) Flow cytometry analysis for binding LAG-3 Fc (gift from Dr. Okazaki from Tokushima University) on CD11c positive immature DC or Mature DC.

A. wt

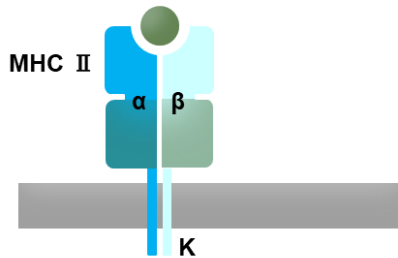

B. K225R

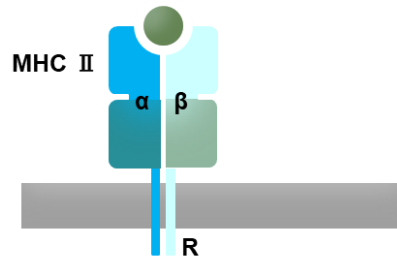

C. KR-Ub1

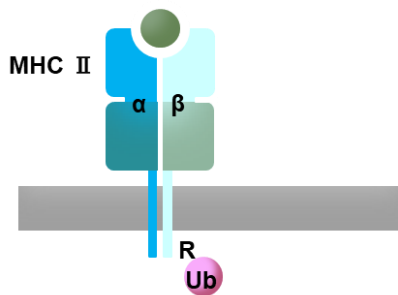

D. KR-Ub1 I44A

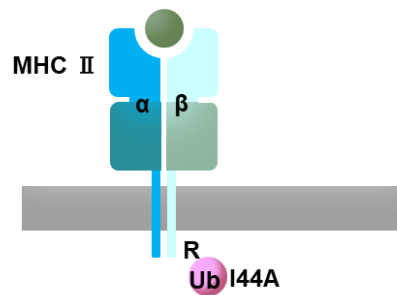

E. KR-Ub2

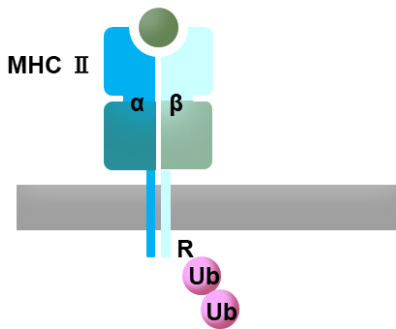

F. KR-Ub4

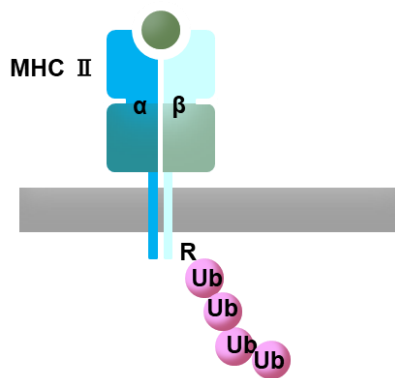

**Supplementary Figure S2.** Stable transfectant for IAKαβ with CLIP. (A) wt IAKαβ. (B) K225R mutation of IAKβ chain. (C) A ubiquitin was covalently linked to K225R mutation of IAKβ chain. (D) A ubiquitin that was induced I44A which is binding site of ubiquitin was covalently linked to K225R mutation of IAKβ chain. (E) Two ubiquitins were covalently linked to K225R mutation of IAKβ chain. (F) Four ubiquitins were covalently linked to K225R mutation of IAKβ chain.
